# Supplementary material for: Single-crystal Pt nanorods with tunable lengths fabricated by a simple glycol-assisted vacuum impregnation method
Source: Royal Society of Chemistry journal article supplement (doi:10.1039/b900262f), 2009-01-01
Supplement: b900262f.pdf [file b900262f.pdf]

## Supplementary Information

# Single-crystal Pt nanorods with tunable length fabricated by a simple glycol-assisted vacuum impregnation method

Hongyang Liu, Ding Ma\* and Xinhe Bao\*

State Key Laboratory of Catalysis, Dalian Institute of Chemical Physics, The Chinese Academy of Sciences, Dalian 116023, P. R. China. Emails: xhbao@dicp.ac.cn (X.Bao); dma@dicp.ac.cn (D.Ma); Fax: +86-0411-8469444; TEL: +86-0411-84379253

### 1. Synthesis

The mesoporous silica SBA-15 was synthesized according to the procedures reported earlier.<sup>1</sup> Briefly, a solution of P123 : HCl : TEOS : H<sub>2</sub>O = 2: 15 : 3.6 : 60 (mass ratio) was prepared, stirred for 24 h at 40 °C, and then heated at 100 °C for 2 days. The products were washed, dried and calcined at 550 °C for 6 h to remove the template. This was the starting material.

In a typical preparation of Pt nanorods incorporation of the SBA-15, 0.5 g of the template-free SBA-15 was dehydrated at 383 K for about 4 h in a homemade vacuum apparatus. After cooling down to room temperature, it was immersed into 2.5ml mixture of glycol, water, and H<sub>2</sub>PtCl<sub>6</sub>.6H<sub>2</sub>O (1.25 ml glycol, 1.25 ml water, 53 mg H<sub>2</sub>PtCl<sub>6</sub>.6H<sub>2</sub>O). The resulting sample (SBA-15 / H<sub>2</sub>PtCl<sub>6</sub> / water / glycol) was quickly transferred into the oven at 413 K and hold for 30 min, then washed and dried at 373 K to get the SBA-15 hosted Pt nanorods (4 wt%). When the concentration of the H<sub>2</sub>PtCl<sub>6</sub>.6H<sub>2</sub>O in the mixture solution was changed, we can get Pt nanorods/SBA-15 with different weight loadings, for instance: 2% (26.5 mg), 8% (106 mg), 16% (212 mg ). Pt nanoparticles/SBA-15 (4 wt%) was prepared with the similar method, except adding 0.5g glucose in the mixture of glycol, water, and H<sub>2</sub>PtCl<sub>6</sub>.6H<sub>2</sub>O (1.25 ml glycol, 1.25 ml water, 53mg H<sub>2</sub>PtCl<sub>6</sub>.6H<sub>2</sub>O). To extract nanorods from

SBA-15, aqueous HF (46 wt %) was diluted to 5.0 wt % with ethanol, and to this solution was added the powder sample. After a few minutes without stirring, the solution turned pale gray, and black Pt nanorods were precipitated. The unsupported Pt nanorods were separated on a filter paper, washed with ethanol, and dried in air.

## **2. Characterization**

The N<sub>2</sub> adsorption–desorption isotherms were recorded on an ASAP 2000 instrument. TEM images were obtained on a Tecnai G<sup>2</sup> Spirit FEI Transmission Electron Microscope operating at 120 kv. The HRTEM images were obtained with Tecnai G<sup>2</sup> F30 S-Twin Transmission Electron Microscope, operating at 300 kv. XRD patterns were collected on a Rigaku D/MAX 2400 diffractometer equipped with a CuKα X-ray source.

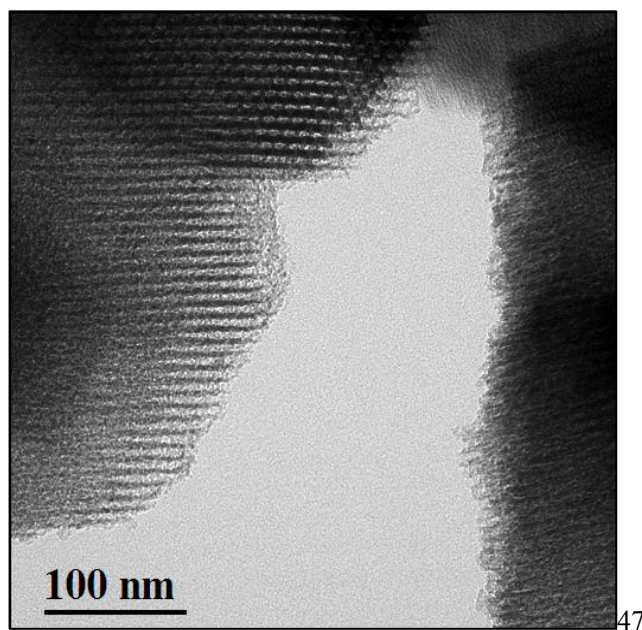

**Figure S1** TEM images of parent SBA-15 with the diameter of around 7 nm.

**Table S1. Physical properties of selected samples**

| Sample            | $S_{\text{BET}}/\text{m}^2\text{g}^{-1}$ | $V_t/\text{cm}^3\text{g}^{-1}$ | $D_{\text{BJH}}/\text{nm}$ | Length of rods/nm |
|-------------------|------------------------------------------|--------------------------------|----------------------------|-------------------|
| SBA-15            | 711                                      | 0.92                           | 5.62                       |                   |
| Pt/SBA-15 (4 wt%) | 582                                      | 0.78                           | 5.57                       | 25-45             |

$S_{\text{BET}}$ , BET specific surface area;  $V_t$ , total pore volume;  $D_{\text{BJH}}$ , pore diameter calculated using BJH method; the length of rods determined by TEM.

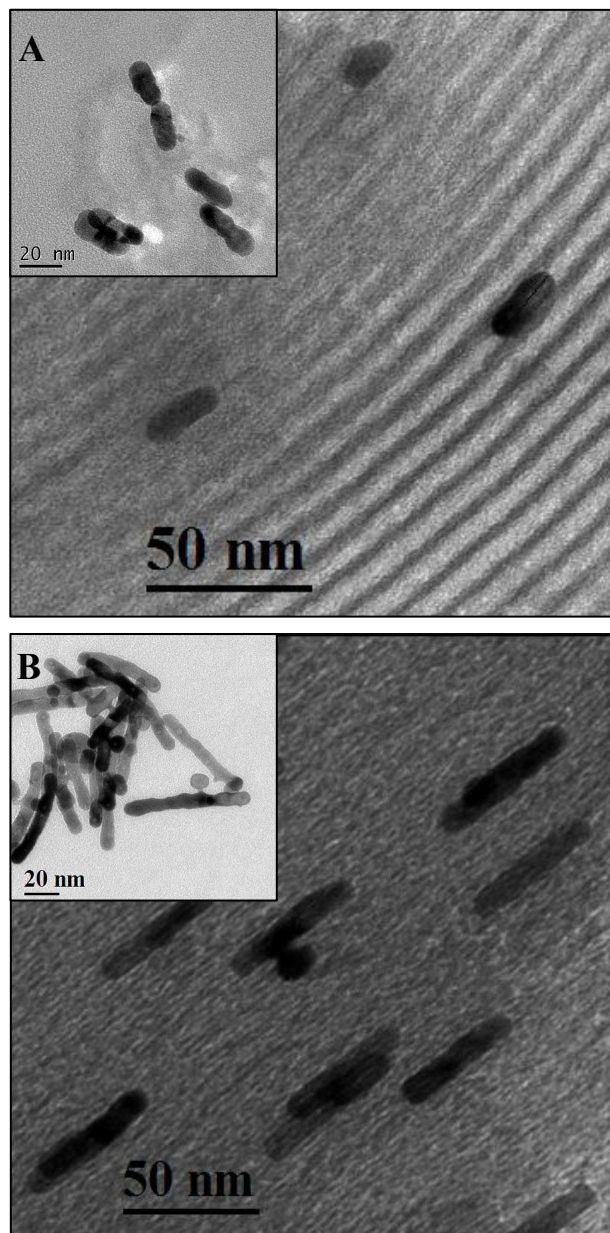

**Figure S2.** Magnification of the TEM images of the SBA-15 hosted Pt nanorods with different lengths: A 15-25 nm (2 wt%), B 50-80 nm (8 wt% ) and inserts are unsupported Pt nanorods extracted from SBA-15 matrix.

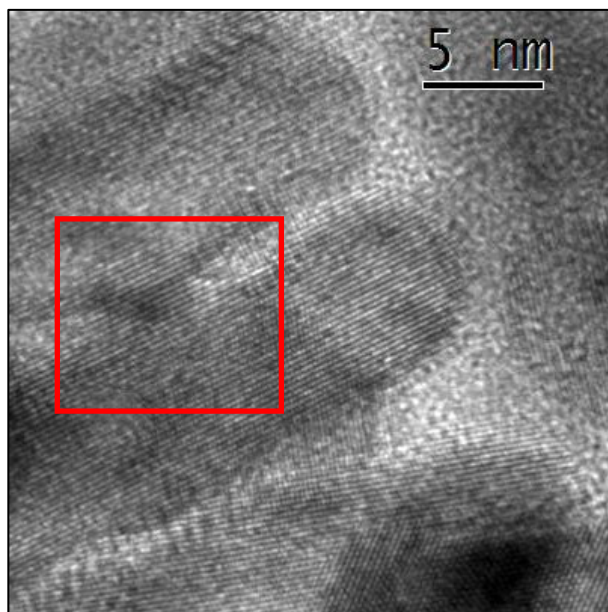

**Figure S3.** HRTEM image of the Pt nanorods bundles extracted from SBA-15 matrix and the interconnected bridge of two pt nanorods marked in the panel.

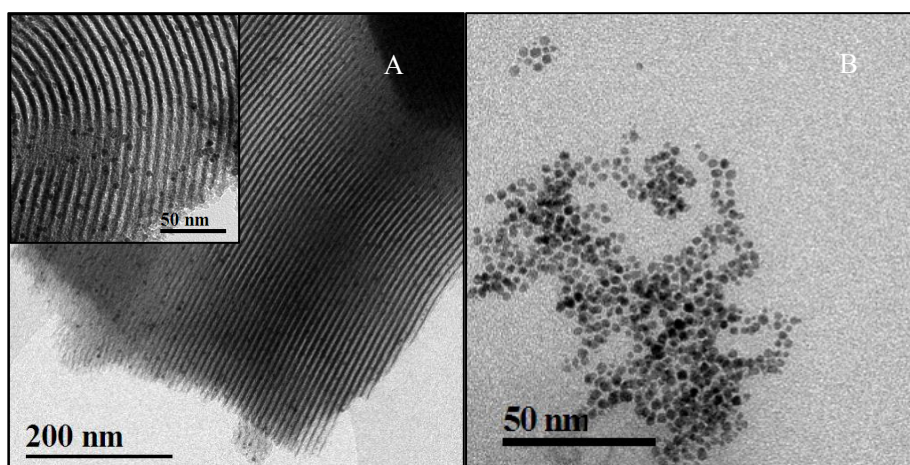

**Figure S4.** TEM images of the Pt nanoparticles incorporation into the SBA-15 (A) (4 wt%) and unsupported Pt nanoparticles after removing the SBA-15 matrix (B). Insert is the magnification.

#### Reference

1 D. Zhao, J. Feng, Q. Huo, B. F. Chmelka and G. D. Stucky, *Science*, 1998, **279**, 548
